# Supplementary material for: Effects of Rh-doping on the photooxidative degradation activity of titanate nanosheets
Source: Royal Society of Chemistry journal article supplement (doi:10.1039/c6ra28731j), 2017-01-01
Supplement: c6ra28731j1.pdf [file c6ra28731j1.pdf]

## Supporting information

### Effects of Rh-doping on the Photooxidative Degradation Activity of Titanate Nanosheets

Wasusate Soontornchaiyakul,<sup>a</sup> Takuya Fujimura<sup>a</sup>, Hisanao Usami<sup>b</sup>, and Ryo Sasai<sup>a\*</sup>

<sup>a</sup> *Interdisciplinary Graduate School of Science and Engineering, Shimane University, 1060, Nishi-kawatsu-cho, Matsue, 690-8501, Shimane, Japan. Email: rsasai@riko.shimane-u.ac.jp TEL/FAX: +81-852-32-6402 (Ext. 6103)*

<sup>b</sup> *Faculty of Textile Science and Technology, Shinshu University, 3-15-1, Tokida, Ueda, 386-0018, Nagano, Japan.*

*\*\*Corresponding Authors*

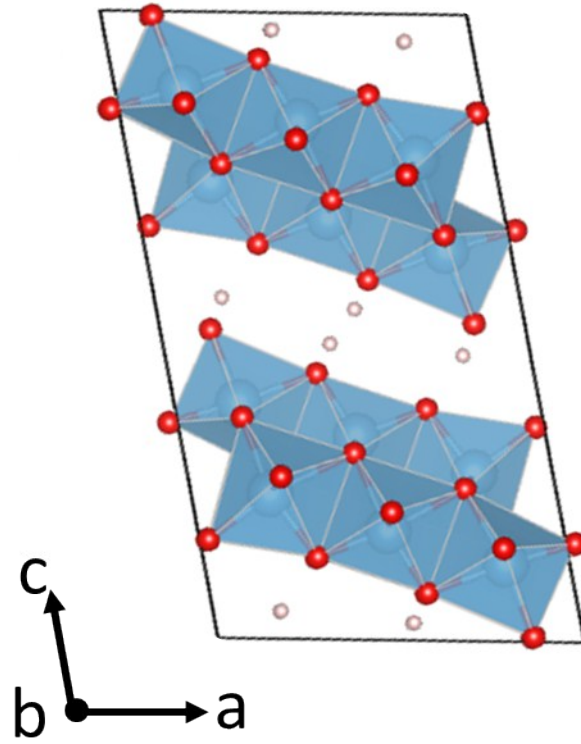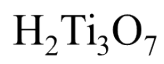

| a     | b     | c     | $\alpha$ | $\beta$ | $\gamma$ |
|-------|-------|-------|----------|---------|----------|
| 0.918 | 0.375 | 1.601 | 90.000   | 101.391 | 90.000   |
| (nm)  |       |       | (deg)    |         |          |

**Fig. S1.** The schematic of  $\text{H}_2\text{Ti}_3\text{O}_7$  crystal shows the monoclinic crystal system which the space group is P2/m.

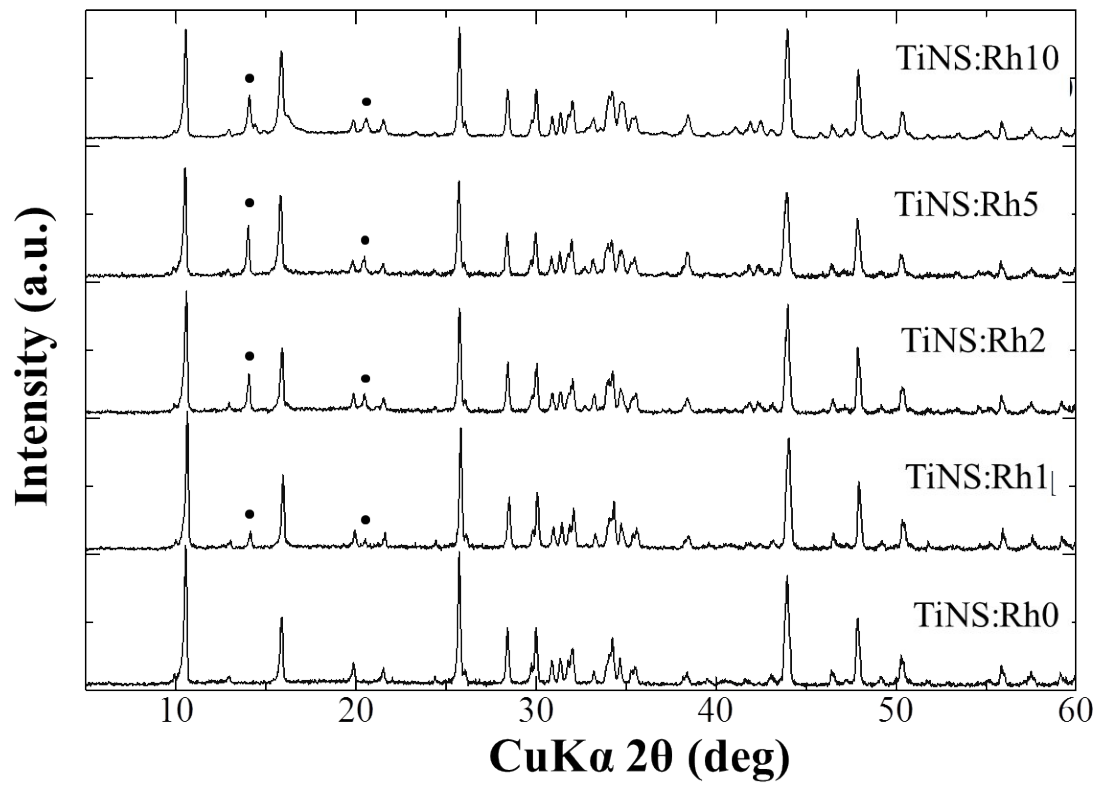

Fig. S2. XRD patterns of synthesized  $\text{Na}_2\text{Ti}_{3-x}\text{Rh}_x\text{O}_7$ , ● is the peak of the unknown.

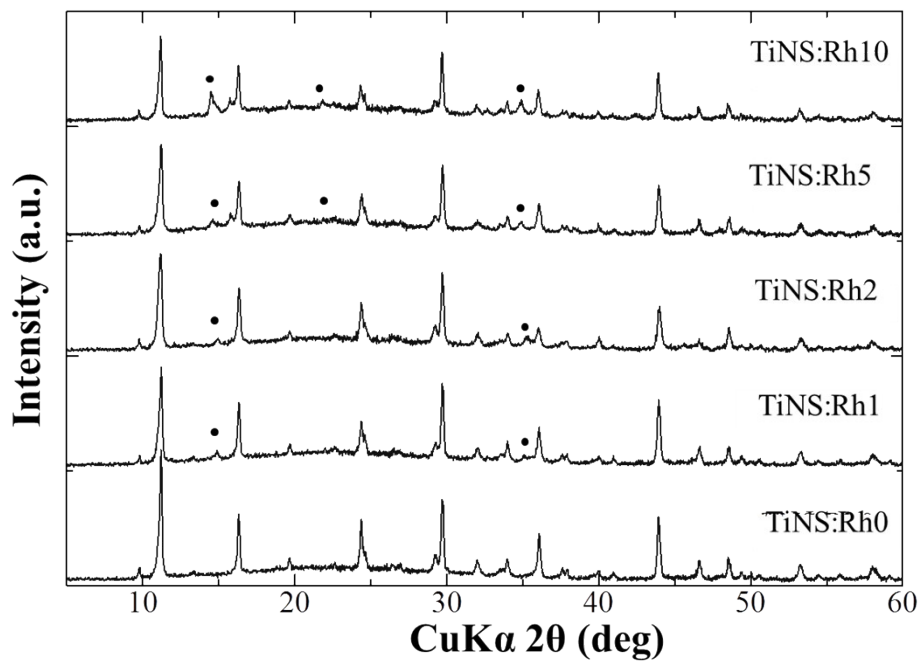

A)

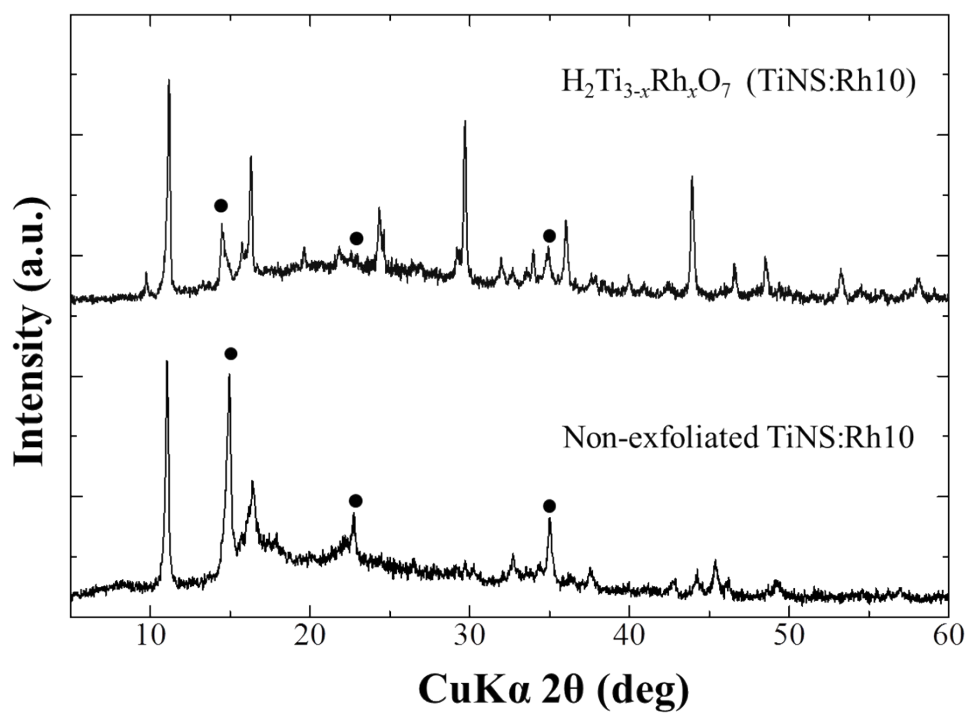

B)

**Fig. S3.** A) XRD patterns of synthesized  $H_2Ti_{3-x}Rh_xO_7$ . And, B) The XRD patterns of the non-exfoliated TiNS:Rh10 compared with  $H_2Ti_{3-x}Rh_xO_7$  (TiNS:Rh10). ● is the peak of the unknown.

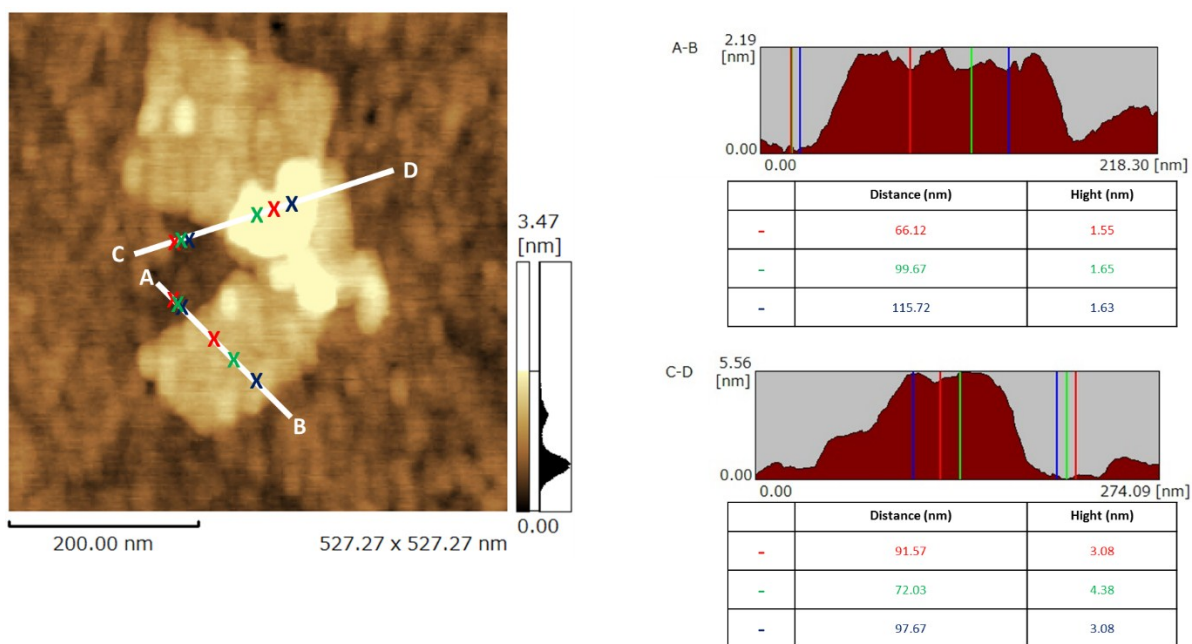

**Fig. S4.** shows the AFM image and its cross sectional profiles of TiNS:RhO on Si substrate. The sample was prepared by dipping a Si substrate in the TiNS:RhO colloidal solution (pH 11) overnight, then washed and dried under vacuum condition. A-B showed the cross section of TiNS 1 sheet. The thickness value of 1 sheet (~1.5-1.6 nm) is 2 times larger than its theoretical value (~0.7 nm), because of TMA<sup>+</sup> ion on TiNS surface. C-D showed cross section of overlapped 2 sheets. The thickness value of overlapped 2 sheets is about 2 times larger than 1 sheet.

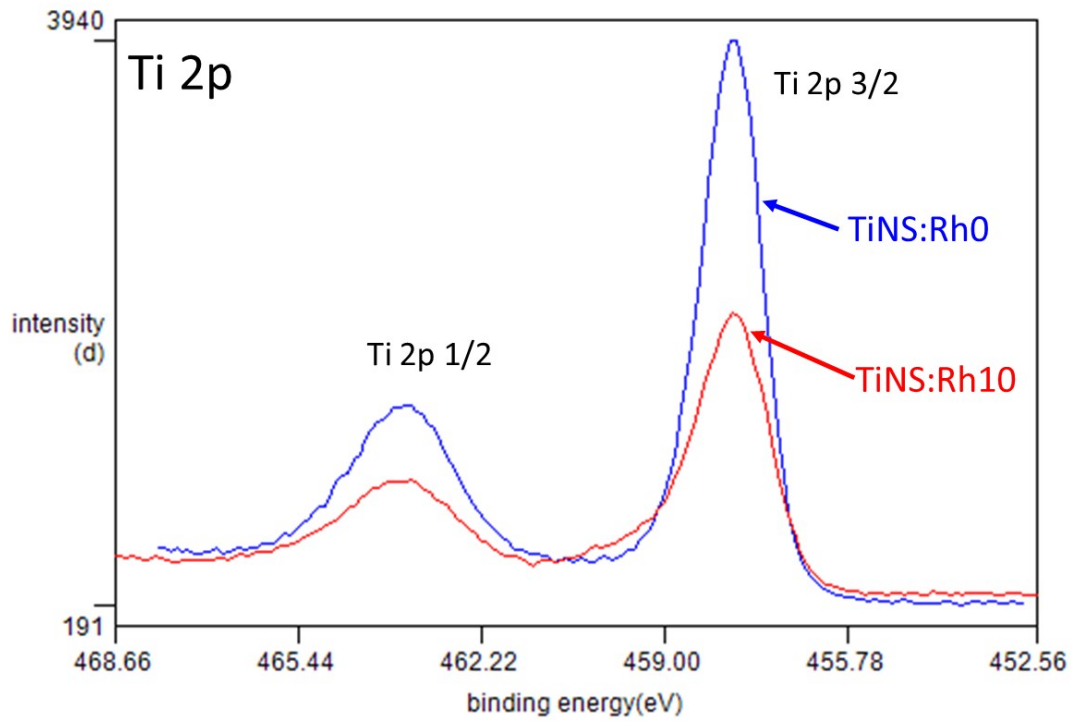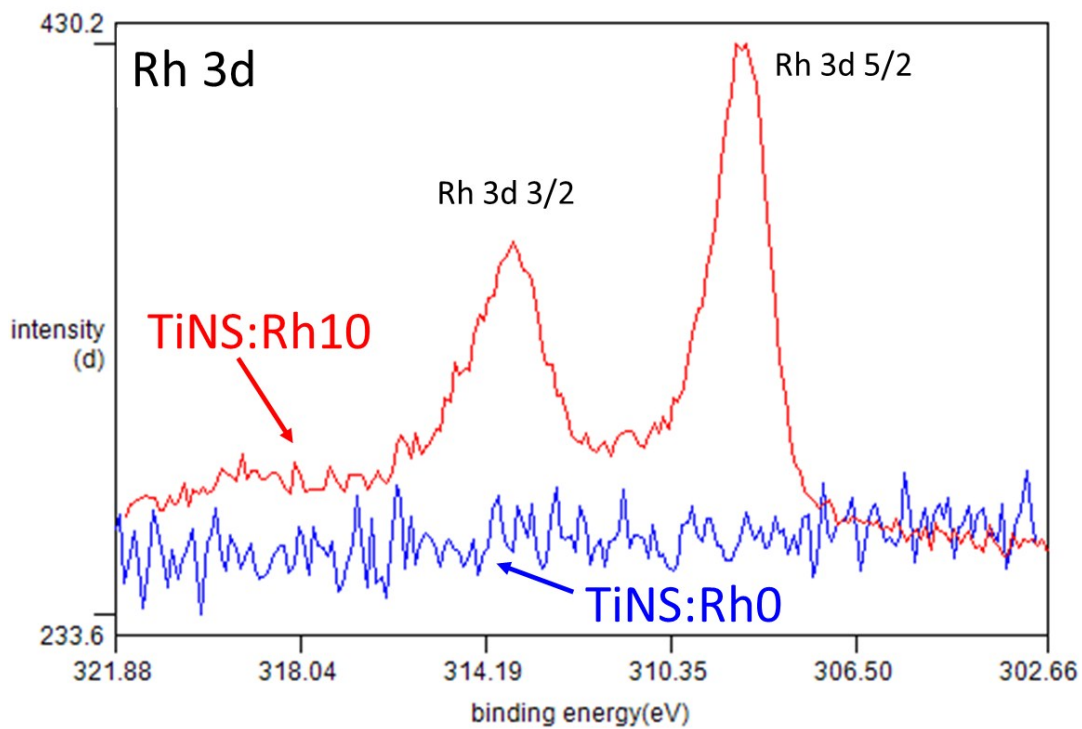

**Fig. S5.** shows XPS spectra of Ti 2p and Rh 3d for TiNS:Rh0 and TiNS:Rh10. The peak intensity of Ti 2p<sub>1/2</sub> and 2p<sub>3/2</sub> decreased after it was doped, this shows that the Rh replaced in the Ti site.

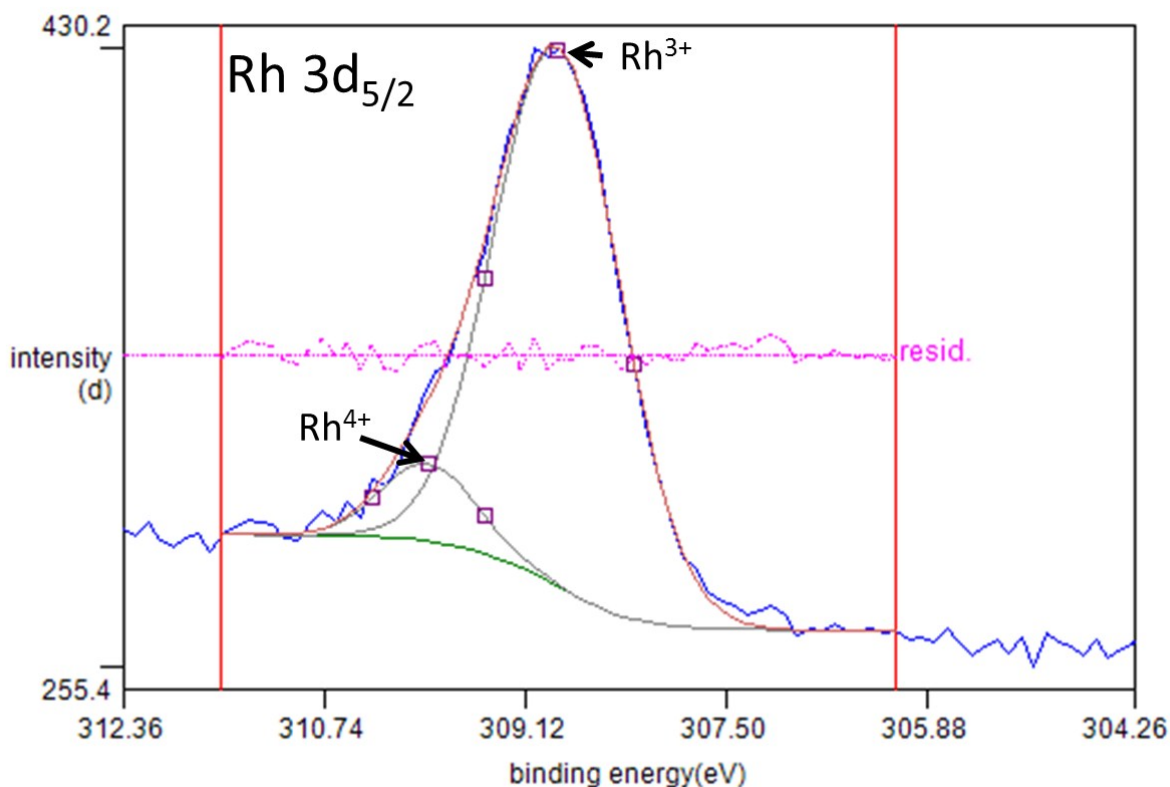

**Fig. S6.** XPS spectra of Rh 3d<sub>5/2</sub>, with fit for Rh<sup>3+</sup> (308.9 eV) and its oxidized state, Rh<sup>4+</sup> (309.9 eV) according to the several authors reported.<sup>s1-s2</sup> It also has been found that the binding energy of Rh<sup>3+</sup> is a little bit higher than Rh<sub>2</sub>O<sub>3</sub>.<sup>s3</sup> This showed that Rh<sup>3+</sup> and Rh<sup>4+</sup> were doped in the lattice of TINS.

#### References

- s1. M. E. E. Grass, Y. Zhang, D. R. Butcher, J. Y. Park, Y. Li, H. Bluhm, K. M. Bratlie, T. Zhang and G. A. Somorjai, *Angew. Chem. Int. Ed.*, 2008, **47**, 8893–8896.
- s2. S. M. Kim, K. Qadir, B. Seo, H. Y. Jeong, S. H. Joo, O. Terasaki and J. Y. Park, *Catal. Lett.*, 2013, **143**, 1153–1161.
- s3. L. S. Kibis, A. I. Stadnichenko, S. V. Koscheev, V. I. Zaikovskii and A. I. Boronin, *J. Phys. Chem. C*, 2016, **120**, 19142–19150.
